# Supplementary material for: Spatial and temporal dynamics of suspended particles and E. coli in a complex surface-water and karst groundwater system as a basis for an adapted water protection scheme, northern Vietnam
Source: Springer Nature journal article supplement (doi:10.1007/s10040-021-02356-6), 2021-05-28
Supplement: MOESM1 [file 19208480]

**Electronic supplementary material – Hydrogeology Journal**

**Spatial and temporal dynamics of suspended particles and *E. coli* in a complex surface-water and karst groundwater system as a basis for an adapted water protection scheme, Northern Vietnam**

Dominik Richter<sup>1</sup>, Nadine Goepfert<sup>1</sup>, Björn Zindler<sup>2</sup>, Nico Goldscheider<sup>1</sup>

*dominik.richter@kit.edu, nadine.goepfert@kit.edu, bjoern.zindler@rub.de, nico.goldscheider@kit.edu*

<sup>1</sup> Karlsruhe Institute of Technology (KIT), Institute of Applied Geosciences, Division of Hydrogeology, Kaiserstr. 12, 76131 Karlsruhe, Germany

<sup>2</sup> Ruhr University Bochum (RUB), Institute of Environmental Engineering and Ecology (eE+E), Universitätsstr. 150, 44780 Bochum, Germany

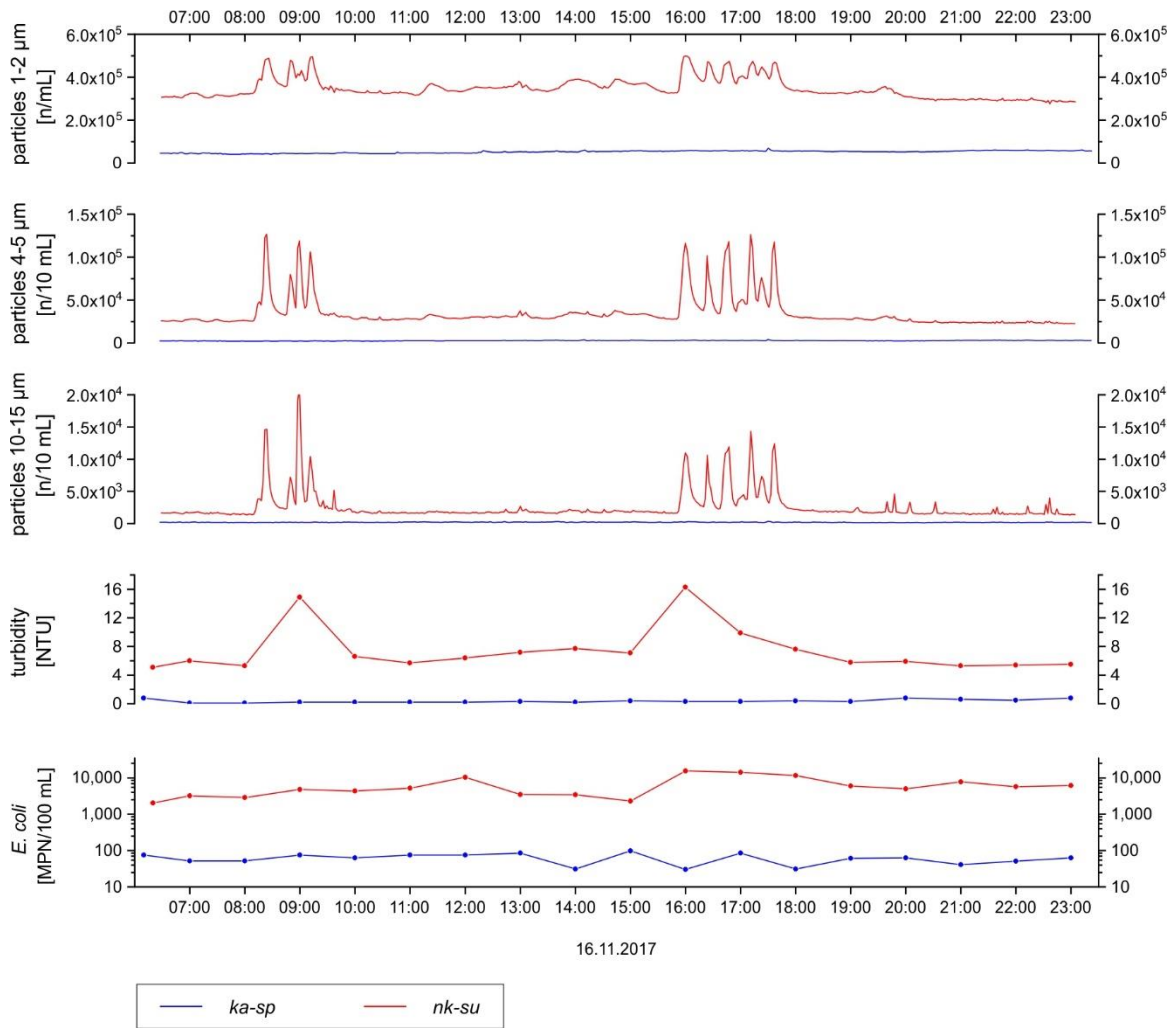

Fig S-1: Measurement series 1 at the surface stream nk-su (red) and the karst spring ka-sp (blue) on November 16<sup>th</sup> 2017 at constant hydraulic conditions, showing the concentration of three different particle-size classes (1-2  $\mu\text{m}$ , 4-5  $\mu\text{m}$ , 10-15  $\mu\text{m}$ , turbidity, and *E. coli* concentration. Constant discharge at nk-su: 50 L/s, at ka-sp: 80 L/s.

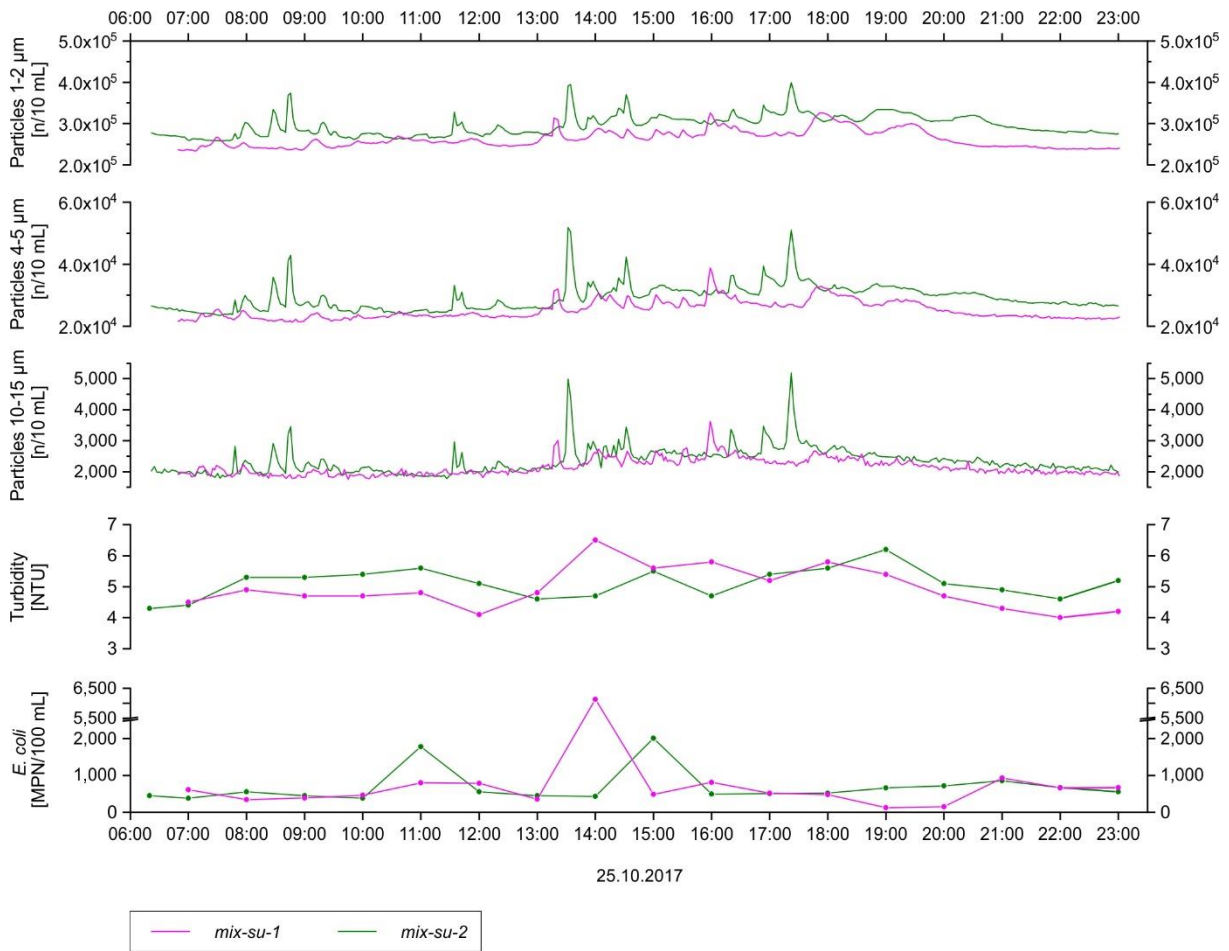

Fig S-2: Measurement series 2 at sampling site mix-su-1 (pink) and mix-su-2 (green) on October 25<sup>th</sup> 2017 at constant hydraulic conditions, showing the concentration of three different particle-size classes (1-2  $\mu\text{m}$ , 4-5  $\mu\text{m}$ , 10-15  $\mu\text{m}$ ), turbidity, and *E. coli* concentration. Constant discharge at mix-su-1: 550 L/s; at mix-su-2: 750 L/s.

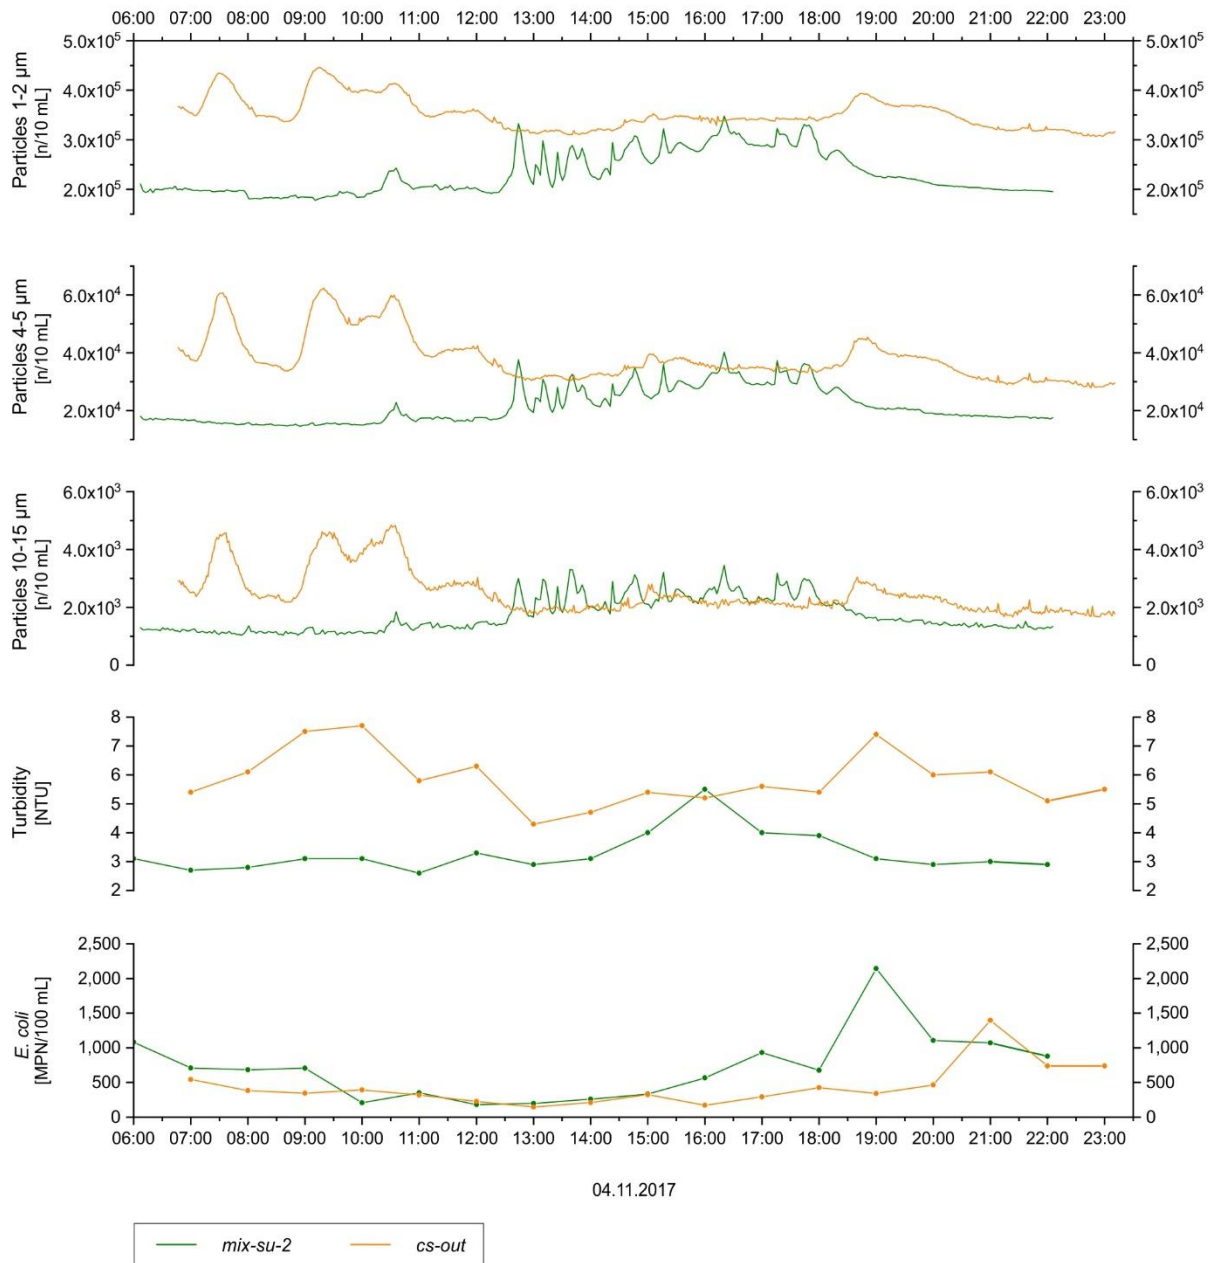

Fig S-3: Measurement series 3 at sampling site mix-su-2 (green) and cs-out (orange) on November 4<sup>th</sup> 2017 at constant hydraulic conditions, showing the concentration of three different particle-size classes (1-2  $\mu\text{m}$ , 4-5  $\mu\text{m}$ , 10-15  $\mu\text{m}$ ), turbidity, and *E. coli* concentration. Constant discharge at mix-su-2: 460 L/s, at cs-out: 640 L/s.

|                       |                            | MEASUREMENT SERIES 1 |                      | MEASUREMENT SERIES 2 |                      | MEASUREMENT SERIES 3 |                      |
|-----------------------|----------------------------|----------------------|----------------------|----------------------|----------------------|----------------------|----------------------|
|                       |                            | <i>ka-sp</i>         | <i>nk-su</i>         | <i>mix-su-1</i>      | <i>mix-su-2</i>      | <i>mix-su-2</i>      | <i>cs-out</i>        |
| particles<br>1-2 µm   | n                          | 380                  | 500                  | 420                  | 378                  | 366                  | 623                  |
|                       | min [n/10 mL]              | 4.02*10 <sup>4</sup> | 2.76*10 <sup>5</sup> | 2.34*10 <sup>5</sup> | 2.59*10 <sup>5</sup> | 1.78*10 <sup>5</sup> | 3.07*10 <sup>5</sup> |
|                       | max [n/10 mL]              | 6.93*10 <sup>4</sup> | 4.98*10 <sup>5</sup> | 3.26*10 <sup>5</sup> | 3.99*10 <sup>5</sup> | 3.48*10 <sup>5</sup> | 4.46*10 <sup>5</sup> |
|                       | mean [n/10 mL]             | 5.14*10 <sup>4</sup> | 3.47*10 <sup>5</sup> | 2.63*10 <sup>5</sup> | 2.96*10 <sup>5</sup> | 2.30*10 <sup>5</sup> | 3.52*10 <sup>5</sup> |
|                       | initial value [n/10 mL]    | 4.52*10 <sup>4</sup> | 3.07*10 <sup>5</sup> | 2.37*10 <sup>5</sup> | 2.78*10 <sup>5</sup> | 2.11*10 <sup>5</sup> | 3.67*10 <sup>5</sup> |
|                       | last value [n/10 mL]       | 5.57*10 <sup>4</sup> | 2.86*10 <sup>5</sup> | 2.41*10 <sup>5</sup> | 2.76*10 <sup>5</sup> | 1.96*10 <sup>5</sup> | 3.17*10 <sup>5</sup> |
|                       | S.D.                       | 5.64*10 <sup>3</sup> | 4.66*10 <sup>4</sup> | 2.09*10 <sup>4</sup> | 2.52*10 <sup>4</sup> | 4.28*10 <sup>4</sup> | 3.20*10 <sup>4</sup> |
|                       | <i>p</i>                   | <i>&lt; 0.001</i>    |                      | <i>&lt; 0.001</i>    |                      | <i>&lt; 0.001</i>    |                      |
|                       | <i>λ</i>                   | <i>&lt; 0.001</i>    |                      | <i>&lt; 0.001</i>    |                      | <i>&lt; 0.001</i>    |                      |
| particles<br>4-5 µm   | n                          | 380                  | 500                  | 420                  | 378                  | 366                  | 623                  |
|                       | min [n/10 mL]              | 1.93*10 <sup>3</sup> | 2.23*10 <sup>4</sup> | 2.13*10 <sup>4</sup> | 2.35*10 <sup>4</sup> | 1.46*10 <sup>4</sup> | 2.79*10 <sup>4</sup> |
|                       | max [n/10 mL]              | 4.09*10 <sup>3</sup> | 1.27*10 <sup>5</sup> | 3.88*10 <sup>4</sup> | 5.19*10 <sup>4</sup> | 4.03*10 <sup>4</sup> | 6.24*10 <sup>4</sup> |
|                       | mean [n/10 mL]             | 2.59*10 <sup>3</sup> | 3.48*10 <sup>4</sup> | 2.51*10 <sup>4</sup> | 2.91*10 <sup>4</sup> | 2.15*10 <sup>4</sup> | 3.81*10 <sup>4</sup> |
|                       | initial value [n/10 mL]    | 2.30*10 <sup>3</sup> | 2.59*10 <sup>4</sup> | 2.16*10 <sup>4</sup> | 2.65*10 <sup>4</sup> | 1.81*10 <sup>4</sup> | 4.19*10 <sup>4</sup> |
|                       | last value [n/10 mL]       | 2.81*10 <sup>3</sup> | 2.26*10 <sup>4</sup> | 2.29*10 <sup>4</sup> | 2.65*10 <sup>4</sup> | 1.75*10 <sup>4</sup> | 2.96*10 <sup>4</sup> |
|                       | S.D.                       | 3.24*10 <sup>2</sup> | 1.83*10 <sup>4</sup> | 2.89*10 <sup>3</sup> | 4.19*10 <sup>3</sup> | 6.17*10 <sup>3</sup> | 8.06*10 <sup>3</sup> |
|                       | <i>p</i>                   | <i>&lt; 0.001</i>    |                      | <i>&lt; 0.001</i>    |                      | <i>&lt; 0.001</i>    |                      |
|                       | <i>λ</i>                   | <i>&lt; 0.001</i>    |                      | <i>&lt; 0.001</i>    |                      | <i>&lt; 0.001</i>    |                      |
| particles<br>10-15 µm | n                          | 380                  | 500                  | 420                  | 378                  | 366                  | 623                  |
|                       | min [n/10 mL]              | 1.17*10 <sup>2</sup> | 1.31*10 <sup>3</sup> | 1.75*10 <sup>3</sup> | 1.77*10 <sup>3</sup> | 1.04*10 <sup>3</sup> | 1.67*10 <sup>3</sup> |
|                       | max [n/10 mL]              | 3.38*10 <sup>2</sup> | 2.13*10 <sup>4</sup> | 3.63*10 <sup>3</sup> | 5.19*10 <sup>3</sup> | 3.45*10 <sup>3</sup> | 4.84*10 <sup>3</sup> |
|                       | mean [n/10 mL]             | 1.91*10 <sup>2</sup> | 2.56*10 <sup>3</sup> | 2.15*10 <sup>3</sup> | 2.34*10 <sup>4</sup> | 1.71*10 <sup>3</sup> | 2.50*10 <sup>3</sup> |
|                       | initial value [n/10 mL]    | 1.91*10 <sup>2</sup> | 1.65*10 <sup>3</sup> | 1.91*10 <sup>3</sup> | 2.03*10 <sup>3</sup> | 1.30*10 <sup>3</sup> | 2.90*10 <sup>3</sup> |
|                       | last value [n/10 mL]       | 1.77*10 <sup>2</sup> | 1.40*10 <sup>3</sup> | 1.87*10 <sup>3</sup> | 1.99*10 <sup>3</sup> | 1.34*10 <sup>3</sup> | 1.76*10 <sup>3</sup> |
|                       | S.D.                       | 3.40*10 <sup>1</sup> | 2.33*10 <sup>3</sup> | 2.63*10 <sup>2</sup> | 4.26*10 <sup>2</sup> | 5.90*10 <sup>2</sup> | 7.55*10 <sup>2</sup> |
|                       | <i>p</i>                   | <i>&lt; 0.001</i>    |                      | <i>&lt; 0.001</i>    |                      | <i>&lt; 0.001</i>    |                      |
|                       | <i>λ</i>                   | <i>&lt; 0.001</i>    |                      | <i>&lt; 0.001</i>    |                      | <i>&lt; 0.001</i>    |                      |
| turbidity             | n                          | 18                   | 18                   | 17                   | 18                   | 17                   | 17                   |
|                       | min [NTU]                  | 0.1                  | 5.1                  | 4.0                  | 4.3                  | 2.6                  | 4.3                  |
|                       | max [NTU]                  | 0.8                  | 16.3                 | 6.5                  | 6.2                  | 5.5                  | 7.7                  |
|                       | mean [NTU]                 | 0.4                  | 7.4                  | 5.0                  | 5.1                  | 3.3                  | 5.9                  |
|                       | initial value [NTU]        | 0.8                  | 5.1                  | 4.5                  | 4.3                  | 3.1                  | 5.4                  |
|                       | last value [NTU]           | 0.8                  | 5.5                  | 0                    | 5.2                  | 2.9                  | 5.5                  |
|                       | S.D.                       | 0.2                  | 3.2                  | 0.7                  | 0.5                  | 0.7                  | 0.9                  |
|                       | <i>p</i>                   | <i>&lt; 0.001</i>    |                      | 0.420                |                      | <i>&lt; 0.001</i>    |                      |
|                       | <i>λ</i>                   | <i>0.001</i>         |                      | 0.193                |                      | 0.238                |                      |
| <i>E. coli</i>        | n                          | 18                   | 18                   | 17                   | 18                   | 17                   | 17                   |
|                       | min [MPN/100 mL]           | 30                   | 2044                 | 127                  | 379                  | 183                  | 146                  |
|                       | max [MPN/100 mL]           | 97                   | 15402                | 6131                 | 2014                 | 2143                 | 1396                 |
|                       | mean [MPN/100 mL]          | 61                   | 6332                 | 866                  | 691                  | 711                  | 439                  |
|                       | initial value [MPN/100 mL] | 75                   | 2044                 | 613                  | 448                  | 1081                 | 545                  |
|                       | last value [MPN/100 mL]    | 63                   | 6160                 | 670                  | 554                  | 880                  | 738                  |
|                       | S.D.                       | 19                   | 4020                 | 1334                 | 445                  | 475                  | 290                  |
|                       | <i>p</i>                   | <i>&lt; 0.001</i>    |                      | 0.611                |                      | 0.060                |                      |
|                       | <i>λ</i>                   | <i>&lt; 0.001</i>    |                      | 0.263                |                      | 0.136                |                      |

Table S-1: Summary statistics for particles (1-2 µm; 4-5 µm; 10-15 µm), turbidity, and *E. coli* for measurement series 1, 2, and 3. *n*, number of samples; *S.D.*, standard deviation; *p*, significance after LSD; *λ*, significant differences for variance after Levene's test. Significant differences (*p* < 0.05) are in italics.

| rs<br>p<br>n          | 1-2 $\mu\text{m}$                | 4-5 $\mu\text{m}$                | 10 - 15 $\mu\text{m}$           | turbidity           | <i>E. coli</i>      |
|-----------------------|----------------------------------|----------------------------------|---------------------------------|---------------------|---------------------|
| 1-2 $\mu\text{m}$     |                                  | 0.83<br><i>&lt; 0.001</i><br>380 | 0.05<br>0.858<br>380            | 0.35<br>0.158<br>18 | 0.32<br>0.196<br>18 |
| 4-5 $\mu\text{m}$     | 0.98<br><i>&lt; 0.001</i><br>500 |                                  | 0.26<br>0.297<br>380            | 0.32<br>0.198<br>18 | 0.08<br>0.752<br>18 |
| 10 - 15 $\mu\text{m}$ | 0.94<br><i>&lt; 0.001</i><br>500 | 0.91<br><i>&lt; 0.001</i><br>500 |                                 | 0.29<br>0.240<br>18 | 0.11<br>0.675<br>18 |
| turbidity             | 0.94<br><i>&lt; 0.001</i><br>18  | 0.90<br><i>&lt; 0.001</i><br>18  | 0.94<br><i>&lt; 0.001</i><br>18 |                     | 0.14<br>0.584<br>18 |
| <i>E. coli</i>        | 0.15<br>0.565<br>18              | 0.12<br>0.627<br>18              | 0.23<br>0.354<br>18             | 0.29<br>0.245<br>18 |                     |

Table S-2: Spearman's rank correlation  $r_s$  with significance  $p$  and the number of measurements  $n$  for measurement series 1 at ka-sp (white) and nk-su (grey). Significant correlations ( $p < 0.05$ ) are in italics.

| rs<br>p<br>n          | 1-2 $\mu\text{m}$                | 4-5 $\mu\text{m}$                | 10 - 15 $\mu\text{m}$            | turbidity            | <i>E. coli</i>      |
|-----------------------|----------------------------------|----------------------------------|----------------------------------|----------------------|---------------------|
| 1-2 $\mu\text{m}$     |                                  | 0.97<br><i>&lt; 0.001</i><br>378 | 0.92<br><i>&lt; 0.001</i><br>378 | 0.35<br>0.151<br>17  | 0.23<br>0.365<br>17 |
| 4-5 $\mu\text{m}$     | 0.93<br><i>&lt; 0.001</i><br>420 |                                  | 0.94<br><i>&lt; 0.001</i><br>378 | 0.36<br>0.138<br>17  | 0.17<br>0.489<br>17 |
| 10 - 15 $\mu\text{m}$ | 0.83<br><i>&lt; 0.001</i><br>420 | 0.93<br><i>&lt; 0.001</i><br>420 |                                  | 0.27<br>0.273<br>17  | 0.03<br>0.916<br>17 |
| turbidity             | 0.84<br><i>&lt; 0.001</i><br>17  | 0.82<br><i>&lt; 0.001</i><br>17  | 0.83<br><i>&lt; 0.001</i><br>17  |                      | 0.40<br>0.096<br>17 |
| <i>E. coli</i>        | 0.01<br>0.970<br>17              | 0.02<br>0.926<br>17              | 0.07<br>0.801<br>17              | -0.08<br>0.764<br>17 |                     |

Table S-3: Spearman's rank correlation  $r_s$  with significance  $p$  and the number of measurements  $n$  for measurement series 2 at mix-su-1 (grey) and mix-su-2 (white). Significant correlations ( $p < 0.05$ ) are in italics.

| rs<br>p<br>n          | 1-2 $\mu\text{m}$                | 4-5 $\mu\text{m}$                | 10 - 15 $\mu\text{m}$            | turbidity                       | <i>E. coli</i>       |
|-----------------------|----------------------------------|----------------------------------|----------------------------------|---------------------------------|----------------------|
| 1-2 $\mu\text{m}$     |                                  | 0.94<br><i>&lt; 0.001</i><br>623 | 0.90<br><i>&lt; 0.001</i><br>623 | 0.80<br><i>&lt; 0.001</i><br>17 | 0.01<br>0.996<br>17  |
| 4-5 $\mu\text{m}$     | 0.96<br><i>&lt; 0.001</i><br>366 |                                  | 0.96<br><i>&lt; 0.001</i><br>623 | 0.73<br><i>0.001</i><br>17      | -0.24<br>0.345<br>17 |
| 10 - 15 $\mu\text{m}$ | 0.85<br><i>&lt; 0.001</i><br>366 | 0.94<br><i>&lt; 0.001</i><br>366 |                                  | 0.70<br><b>0.002</b><br>17      | -0.17<br>0.525<br>17 |
| turbidity             | 0.68<br><i>0.003</i><br>17       | 0.64<br><i>0.006</i><br>17       | 0.60<br><i>0.010</i><br>17       |                                 | 0.24<br>0.346<br>17  |
| <i>E. coli</i>        | 0.06<br>0.830<br>17              | 0.05<br>0.837<br>17              | -0.10<br>0.694<br>17             | -0.15<br>0.561<br>17            |                      |

Table S-4: Spearman's rank correlation  $r_s$  with significance  $p$  and the number of measurements  $n$  for measurement series 3 at mix-su-1 (grey) and cs-out (white). Significant correlations ( $p < 0.05$ ) are in italics.
